# Supplementary material
Source: publisher figshare collection journal article supplement (https://gsajournals.figshare.com/ndownloader/files/14515274)
Supplement: Supplementary file 1 [file 14515274]

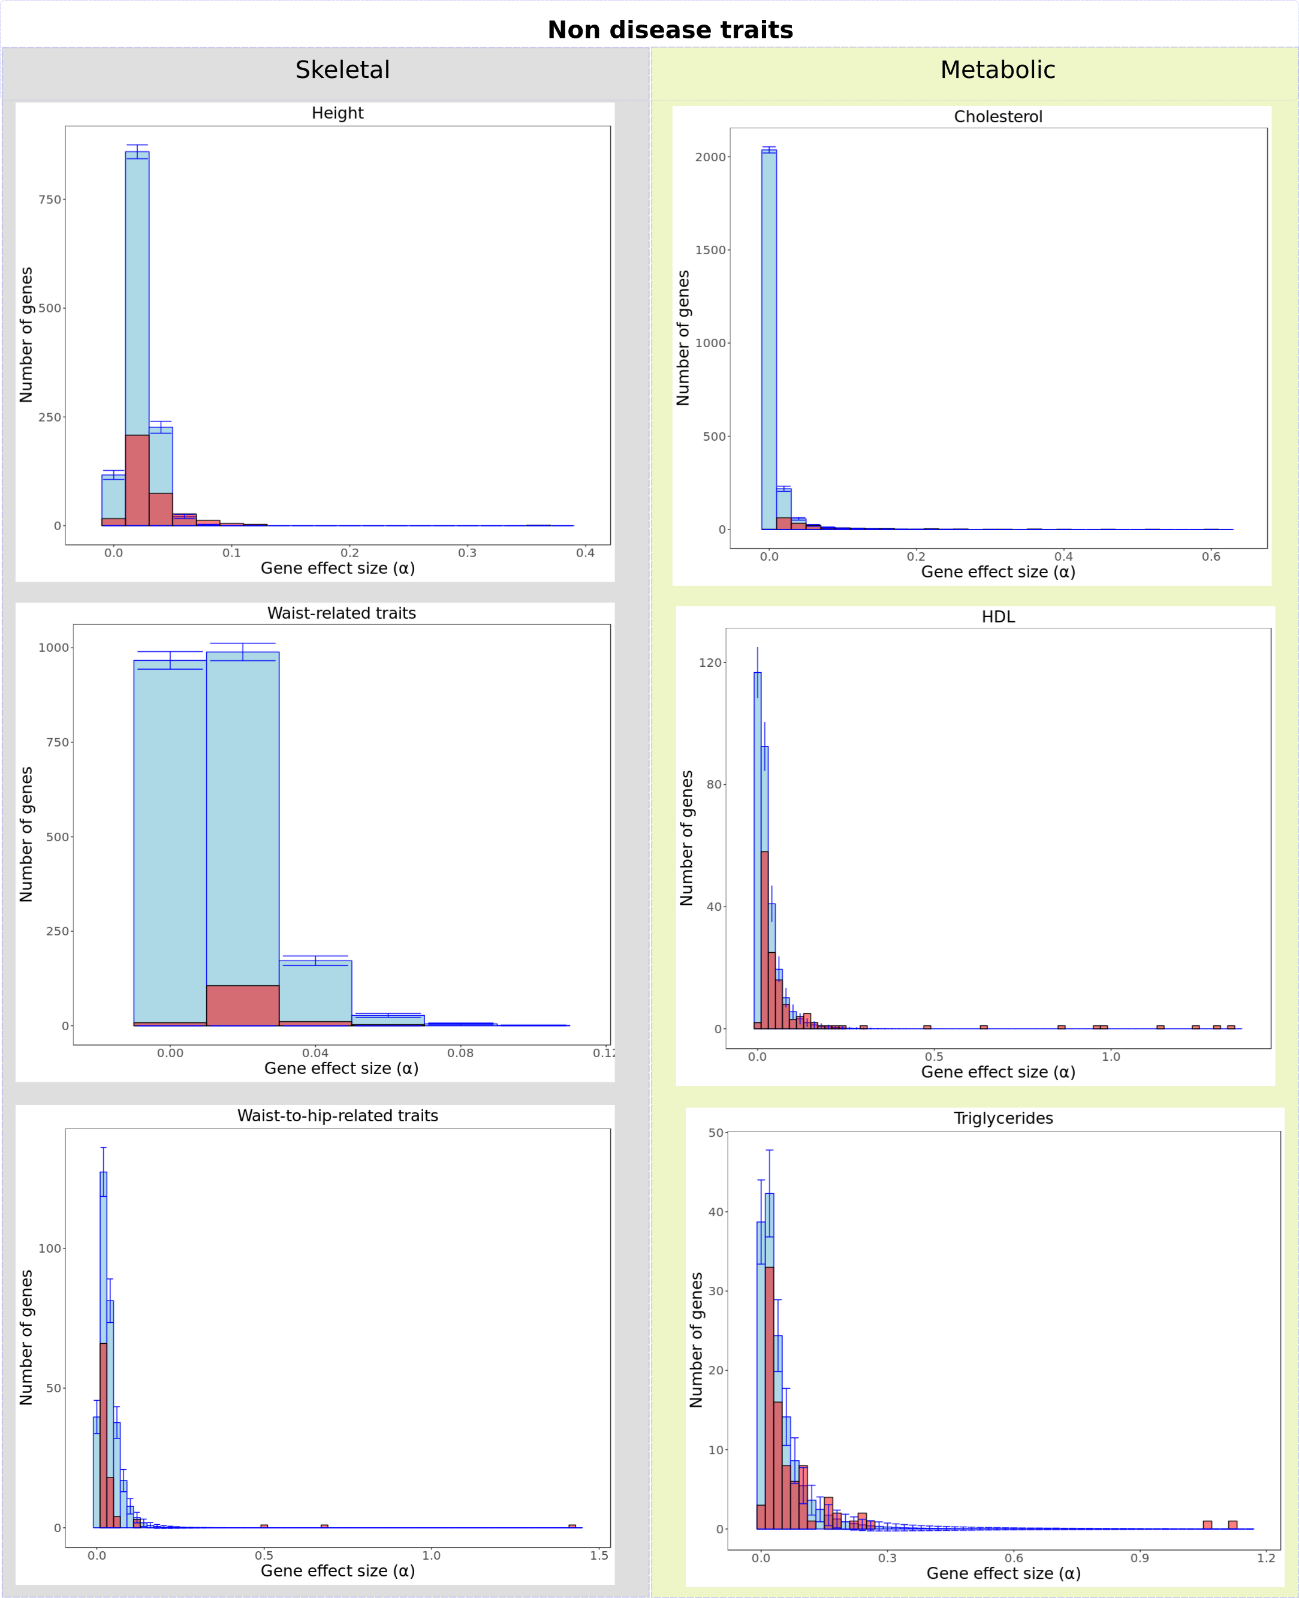


**Figure S2. Distribution of locus effect sizes for non-disease traits.** In red it is shown the expected distribution. In blue, the inferred expected distribution with returns a heritability value that approaches the most to the familial value.
